# Supplementary material for: Mesenchymal stem cells alleviate the early brain injury of subarachnoid hemorrhage partly by suppression of Notch1-dependent neuroinflammation: involvement of Botch
Source: PubMed Central journal article supplement (PMC6334441; doi:10.1186/s12974-019-1396-5), 2019-01-15

# Experiment 1

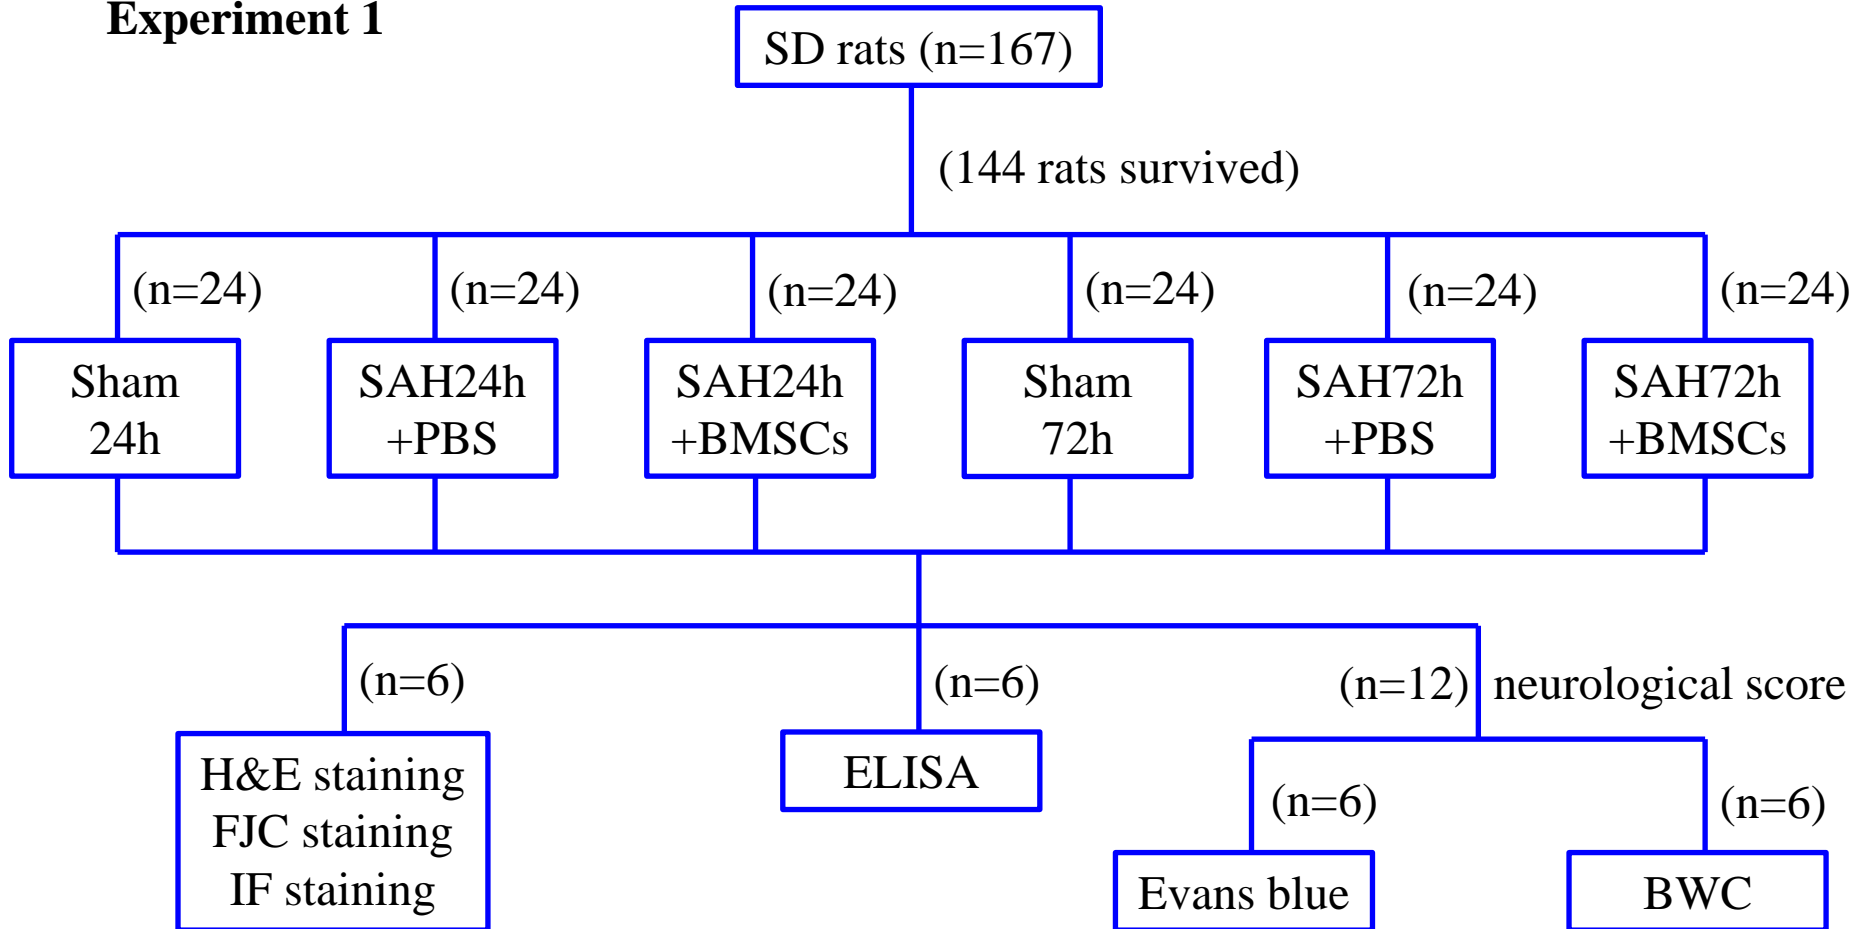

## Experiment 2

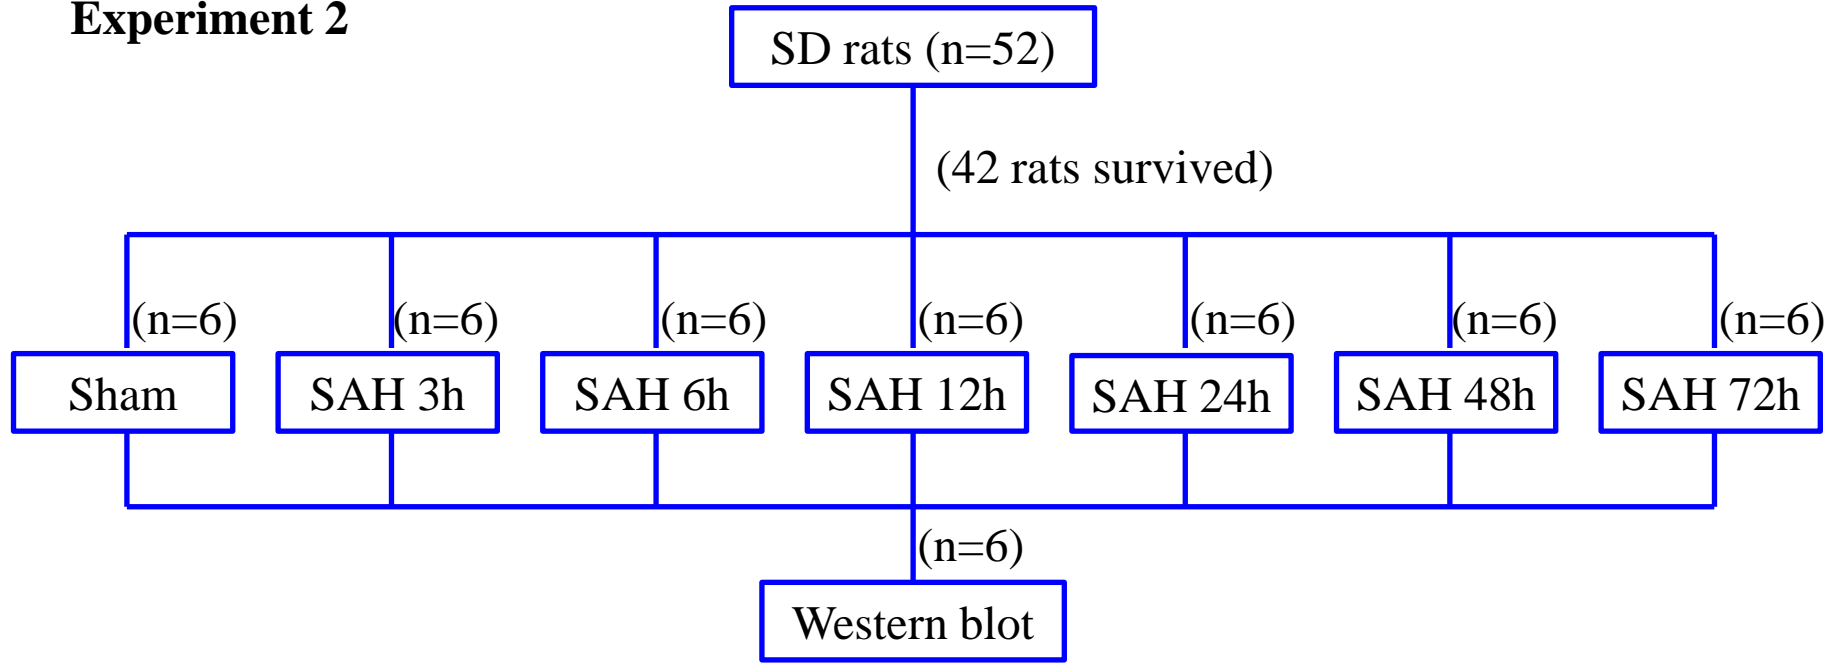

### Experiment 3

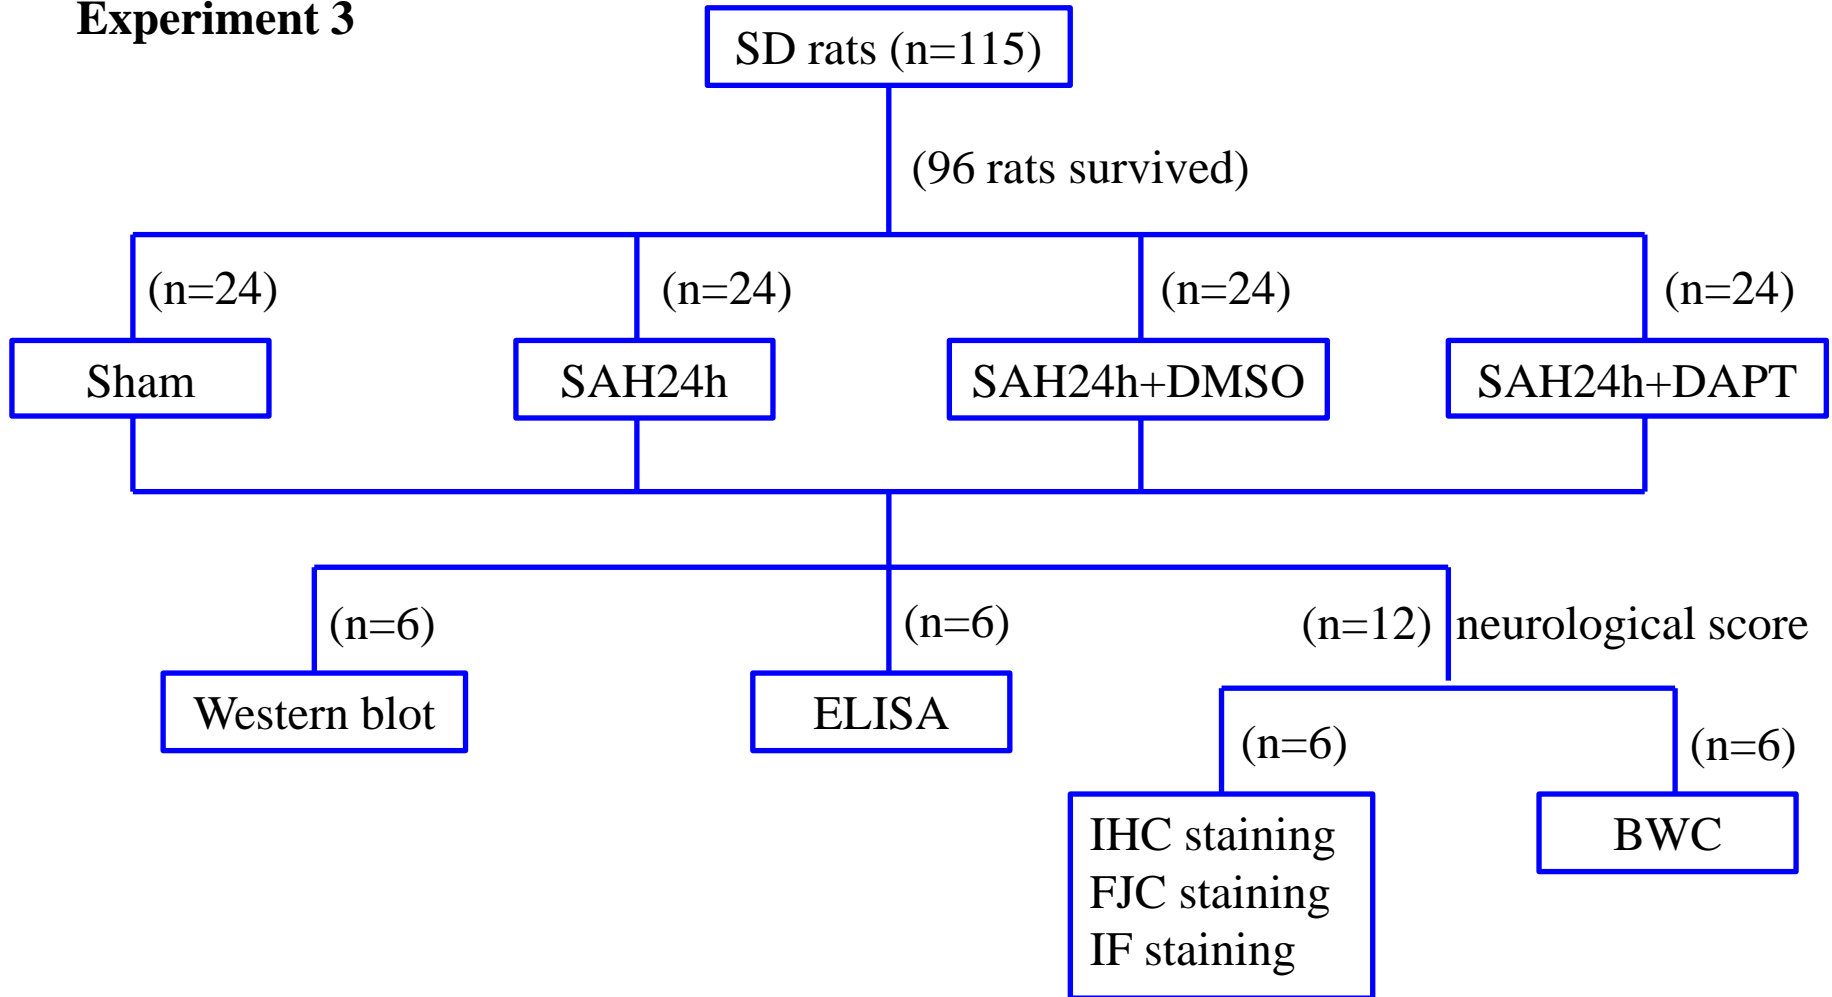

## Experiment 4

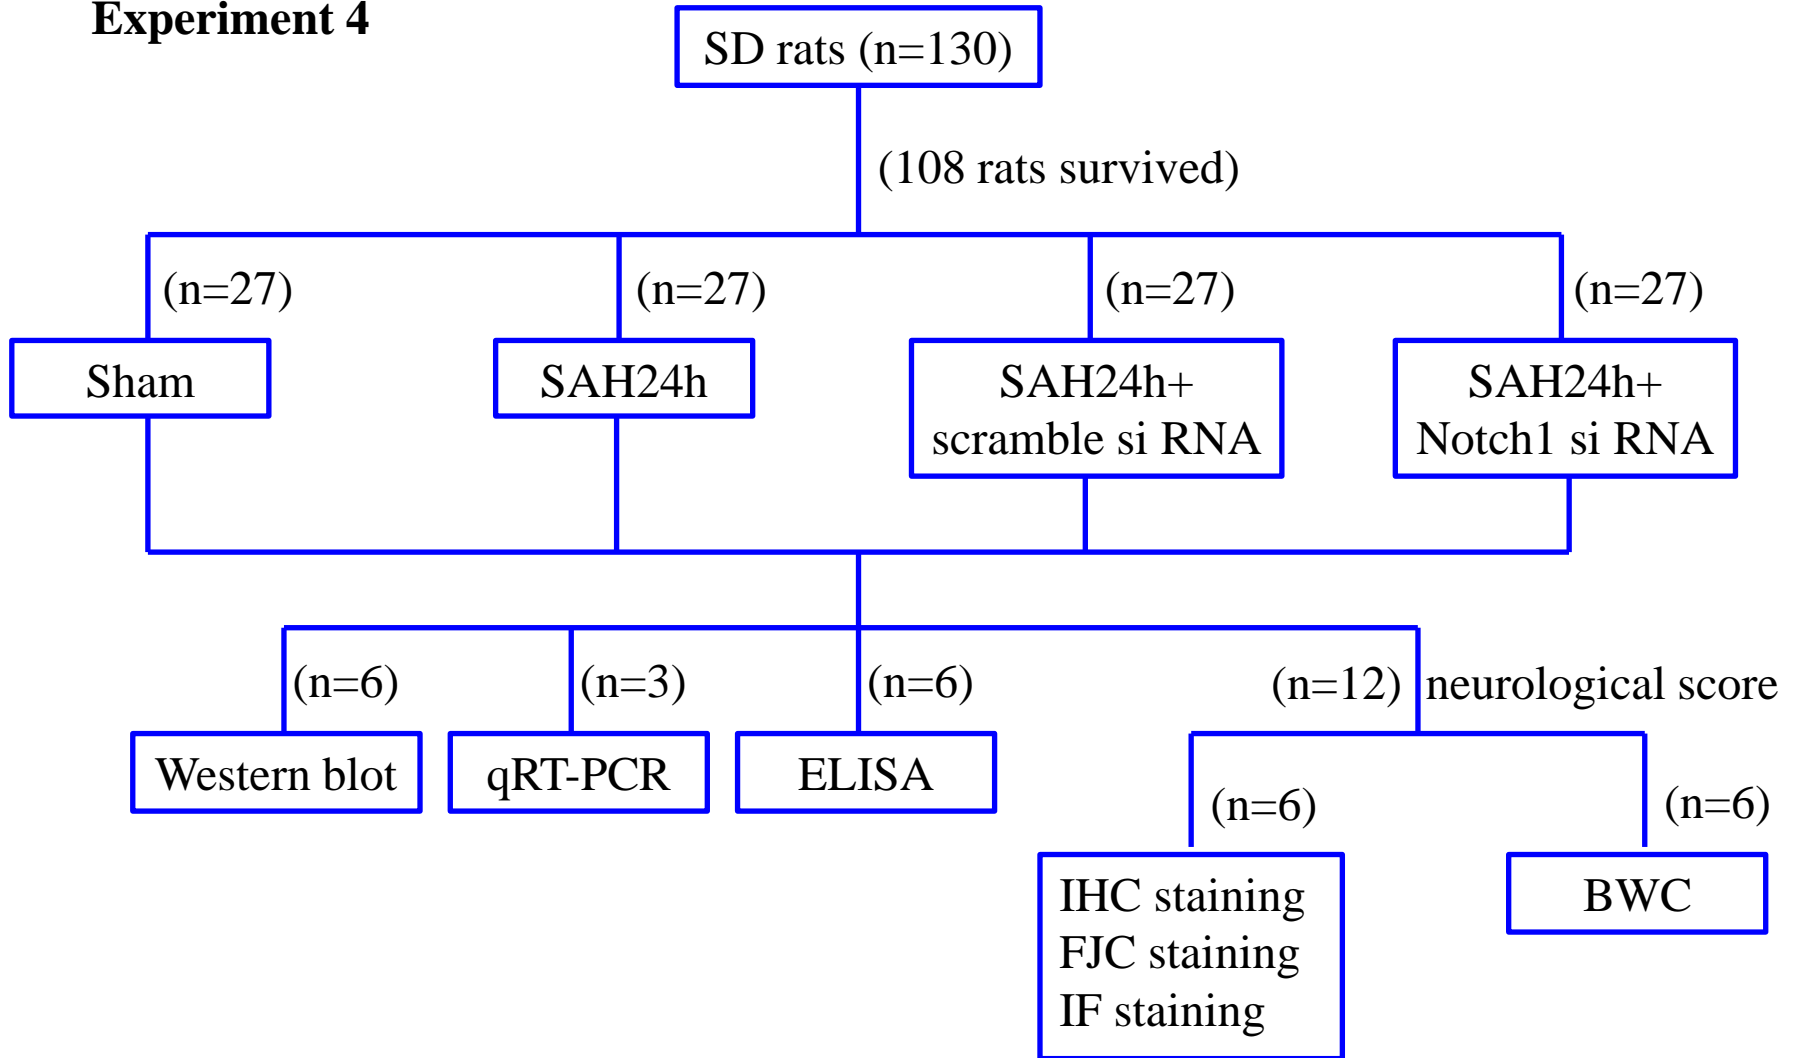

## Experiment 5

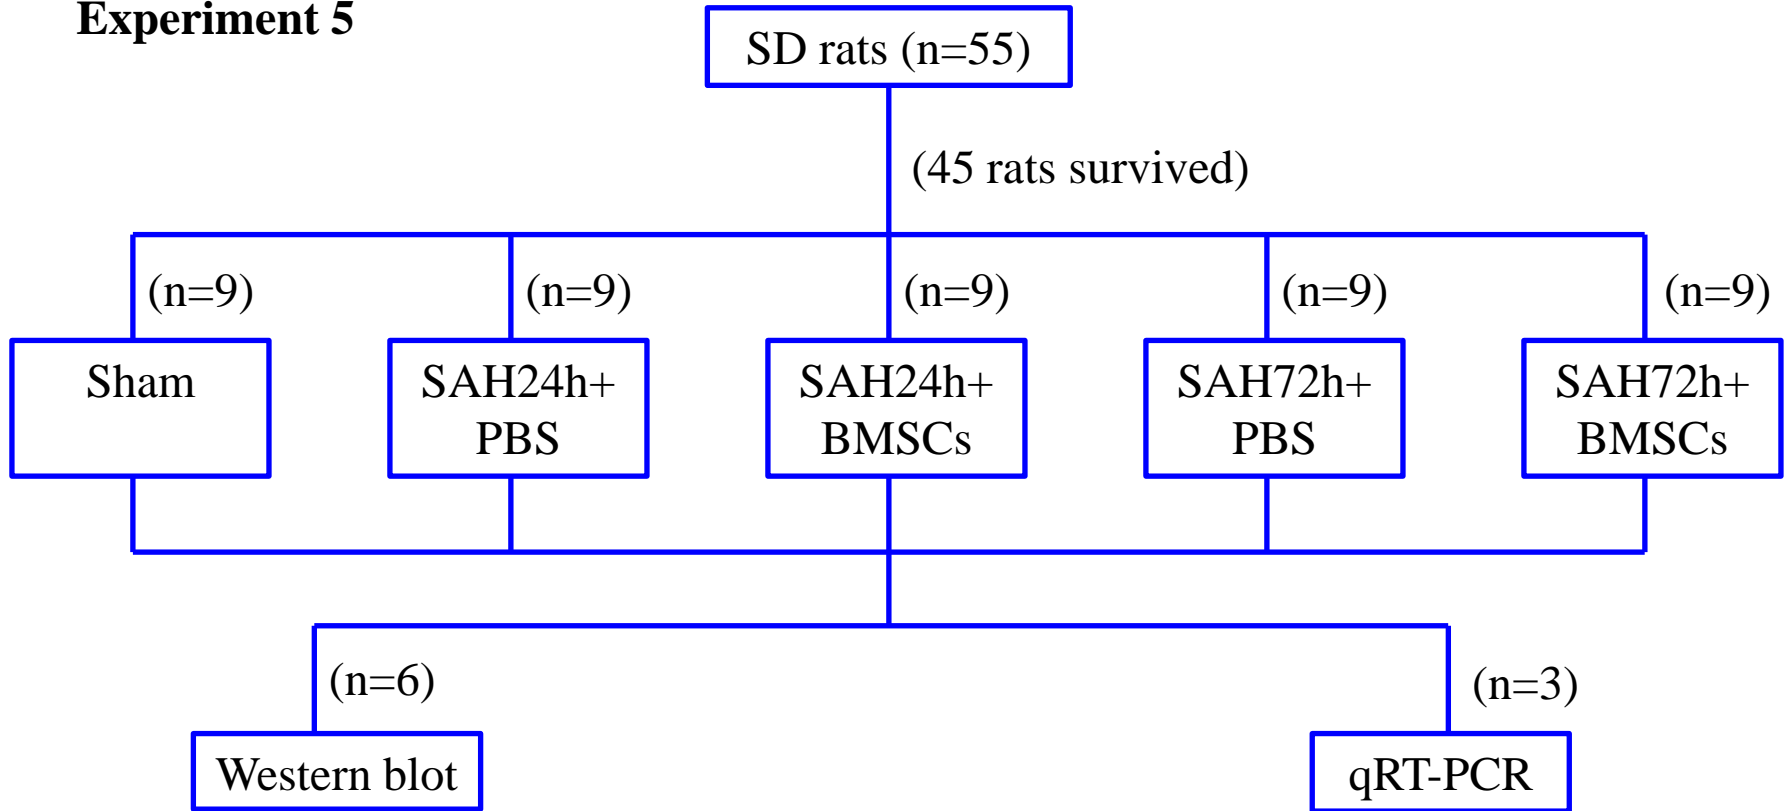

## Experiment 6

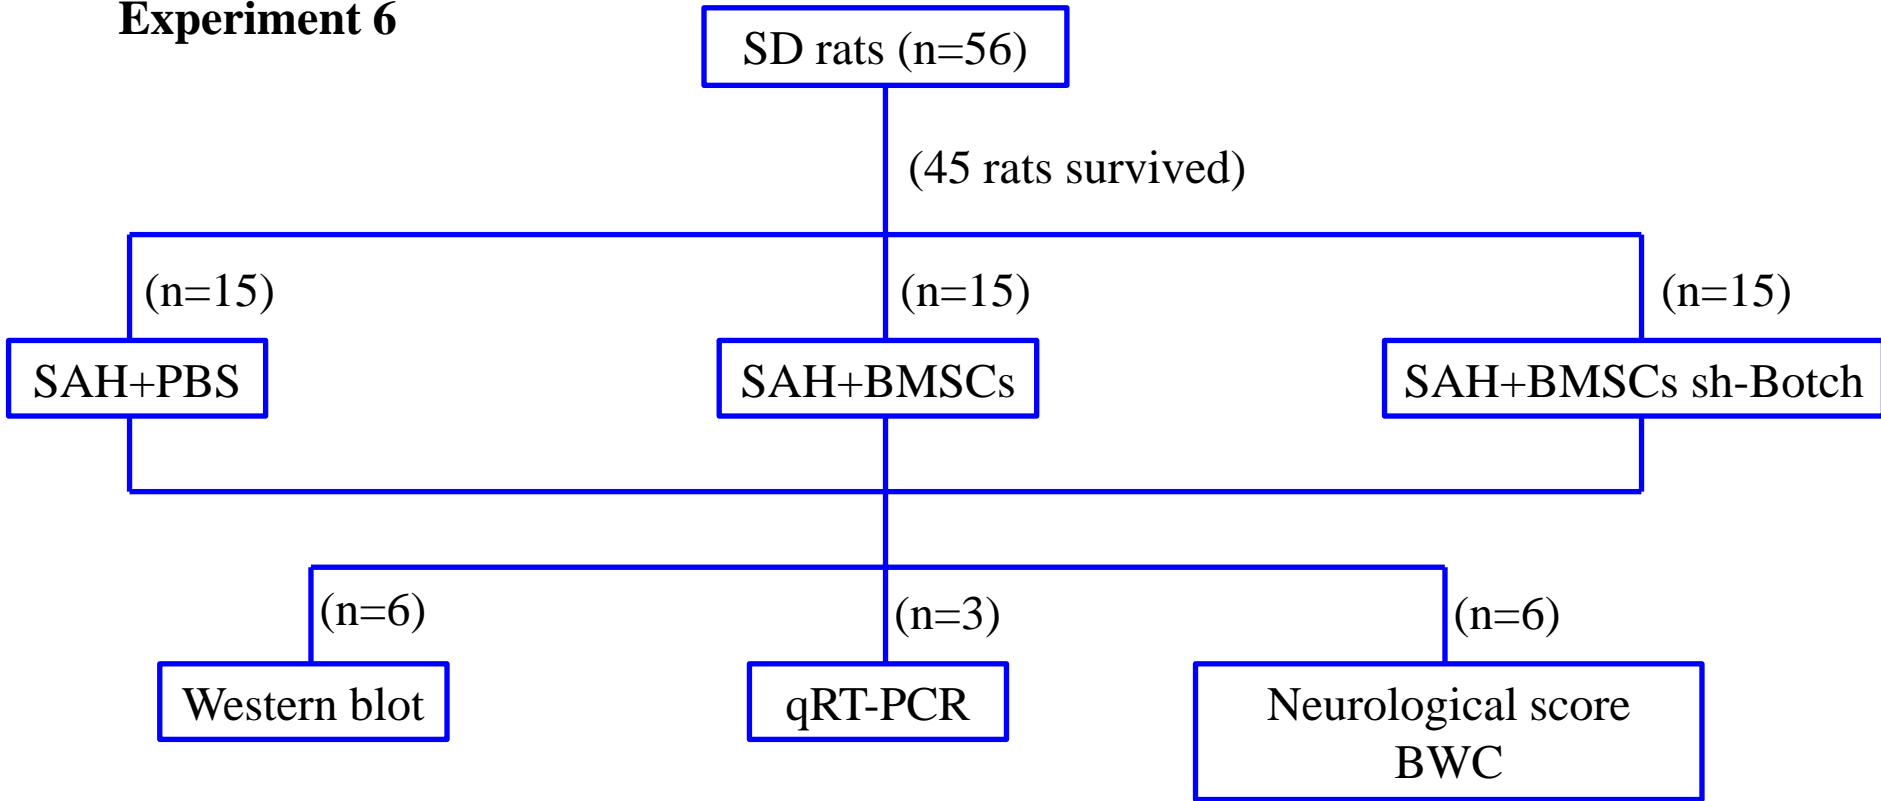

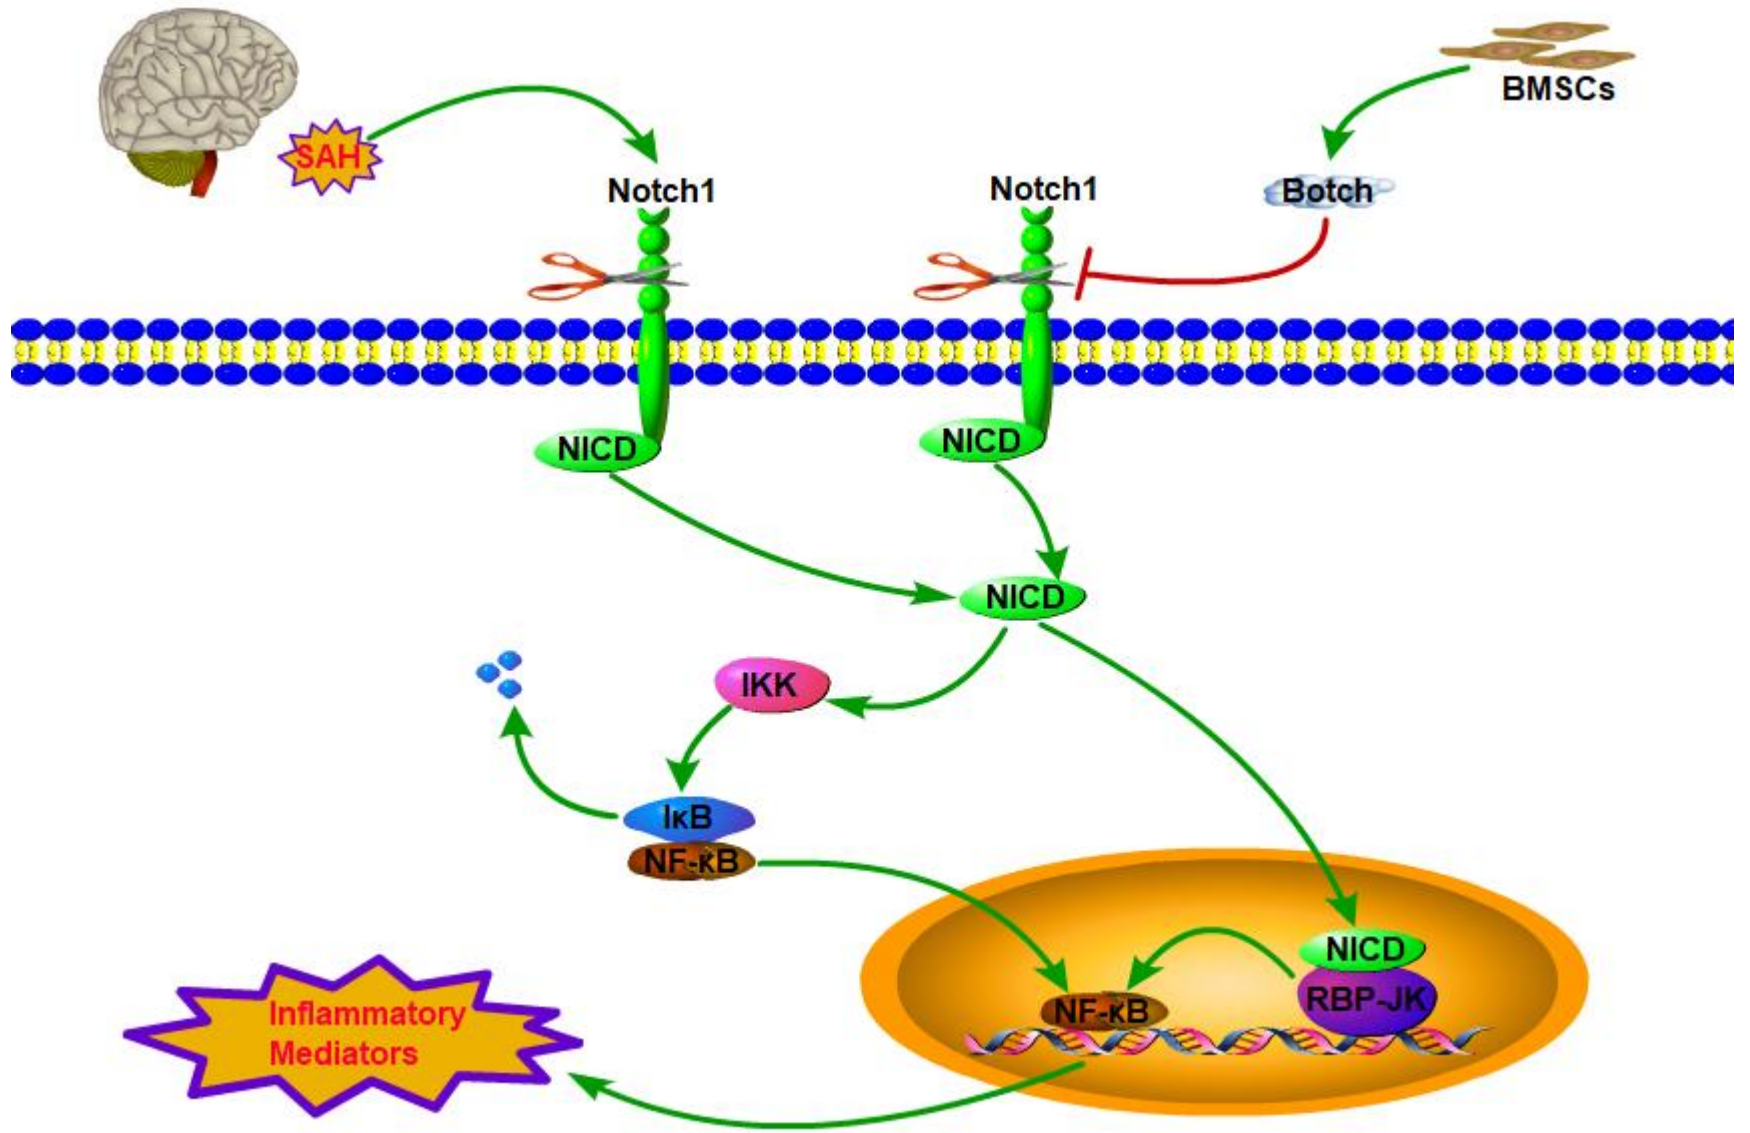

Supplement: 12974_2019_1396_MOESM1_ESM.pdf [file 12974_2019_1396_MOESM1_ESM.pdf]
